# Supplementary material for: Physiological and RNA-Seq Analyses on Exogenous Strigolactones Alleviating Drought by Improving Antioxidation and Photosynthesis in Wheat (Triticum aestivum L.)
Source: MDPI journal article supplement (doi:10.3390/antiox12101884), 2023-10-20
Supplement: s1 [file s1]

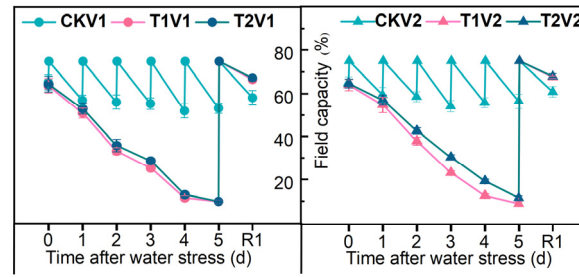

Figure S1. Changes in field capacity of potted plants. The X-axis was the time after water treatment. Data indicate mean  $\pm$  SD ( $n = 3$ ).

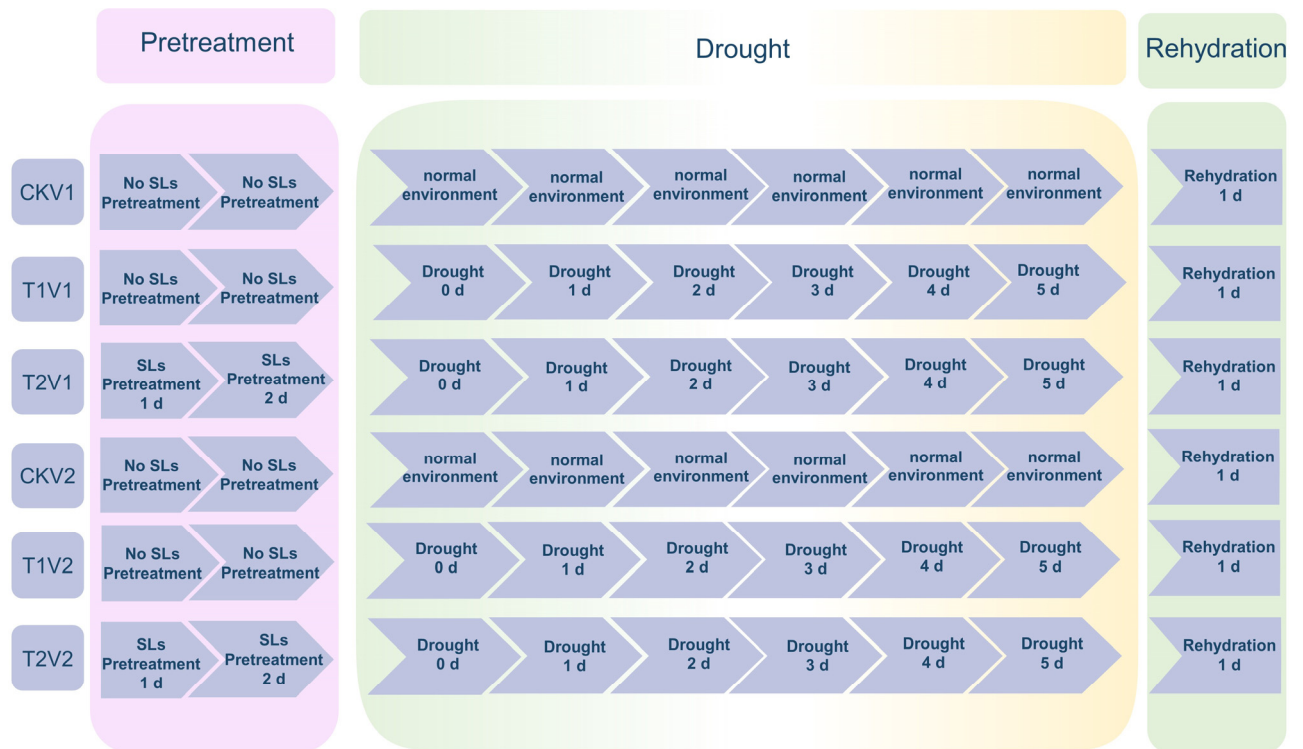

Figure S2. Illustration of the experimental design and procedure. Normal environment mean watering soil content to 75% field capacity daily.

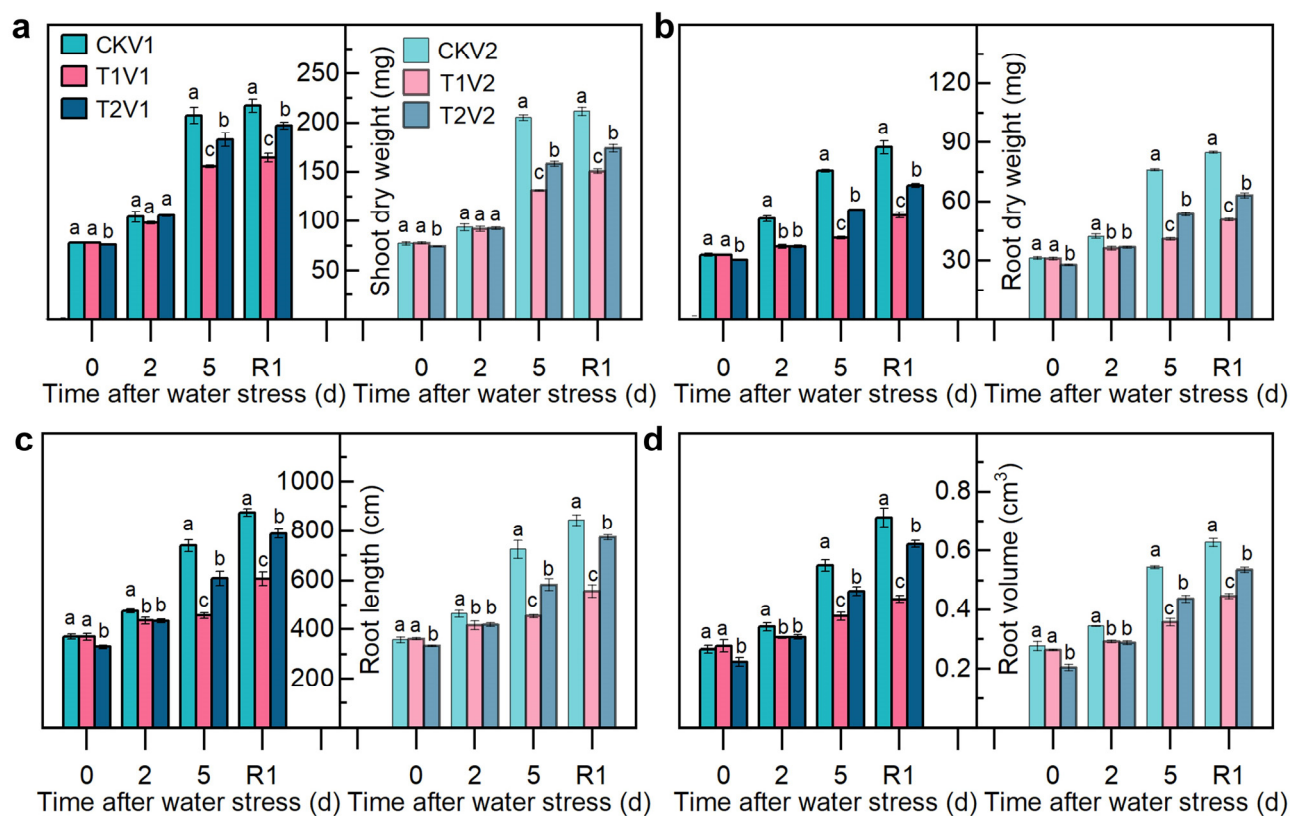

Figure S3. Dry weight and root architecture. a, shoot dry weight; b, root dry weight; c, root length; d, root volume. Different letters indicate significant difference at  $p < 0.05$  according to one-way ANOVA followed by Duncan's test. Data indicate mean  $\pm$  SD ( $n = 3$ ).

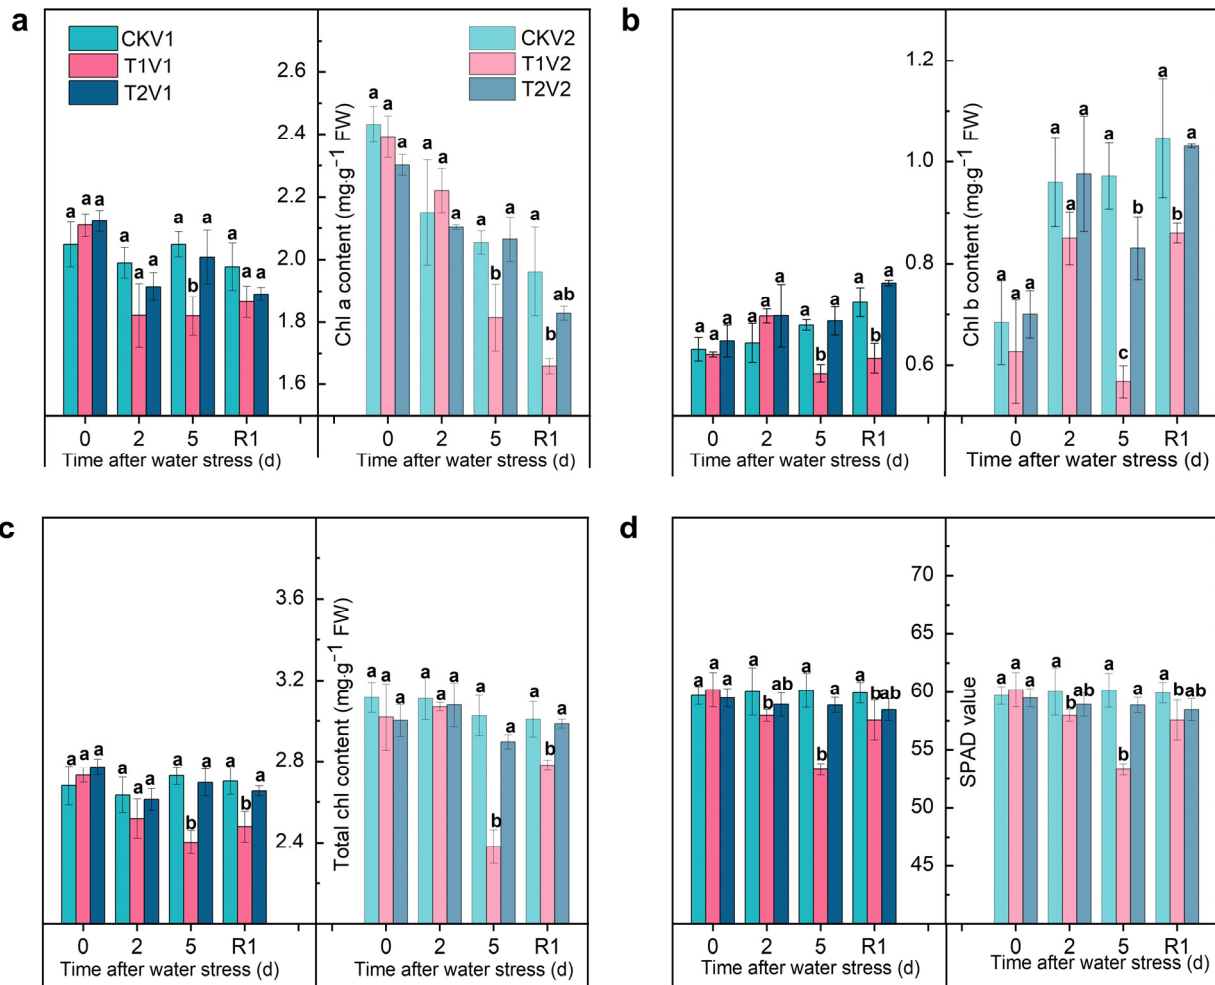

Figure S4. Chlorophyll content and SPAD value of wheat top expanded leaves between different treatments. a, chlorophyll a content; b, chlorophyll b content; c, total chlorophyll content; d, SPAD value. Different letters indicate significant difference at  $p < 0.05$  according to one-way ANOVA followed by Duncan's test. Data indicate mean  $\pm$  SD ( $n = 3$ ).

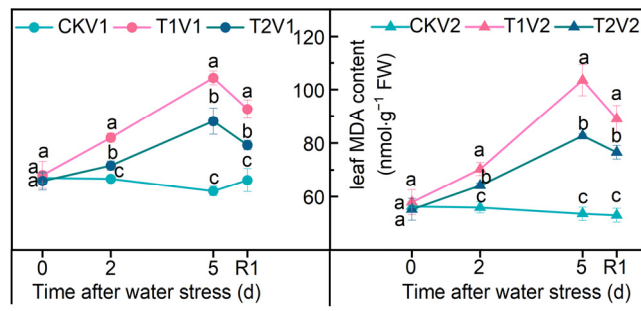

Figure S5. MDA content of wheat leaves between different treatments. Different letters indicate significant difference at  $p < 0.05$  according to one-way ANOVA followed by Duncan's test. Data indicate mean  $\pm$  SD (n = 3).

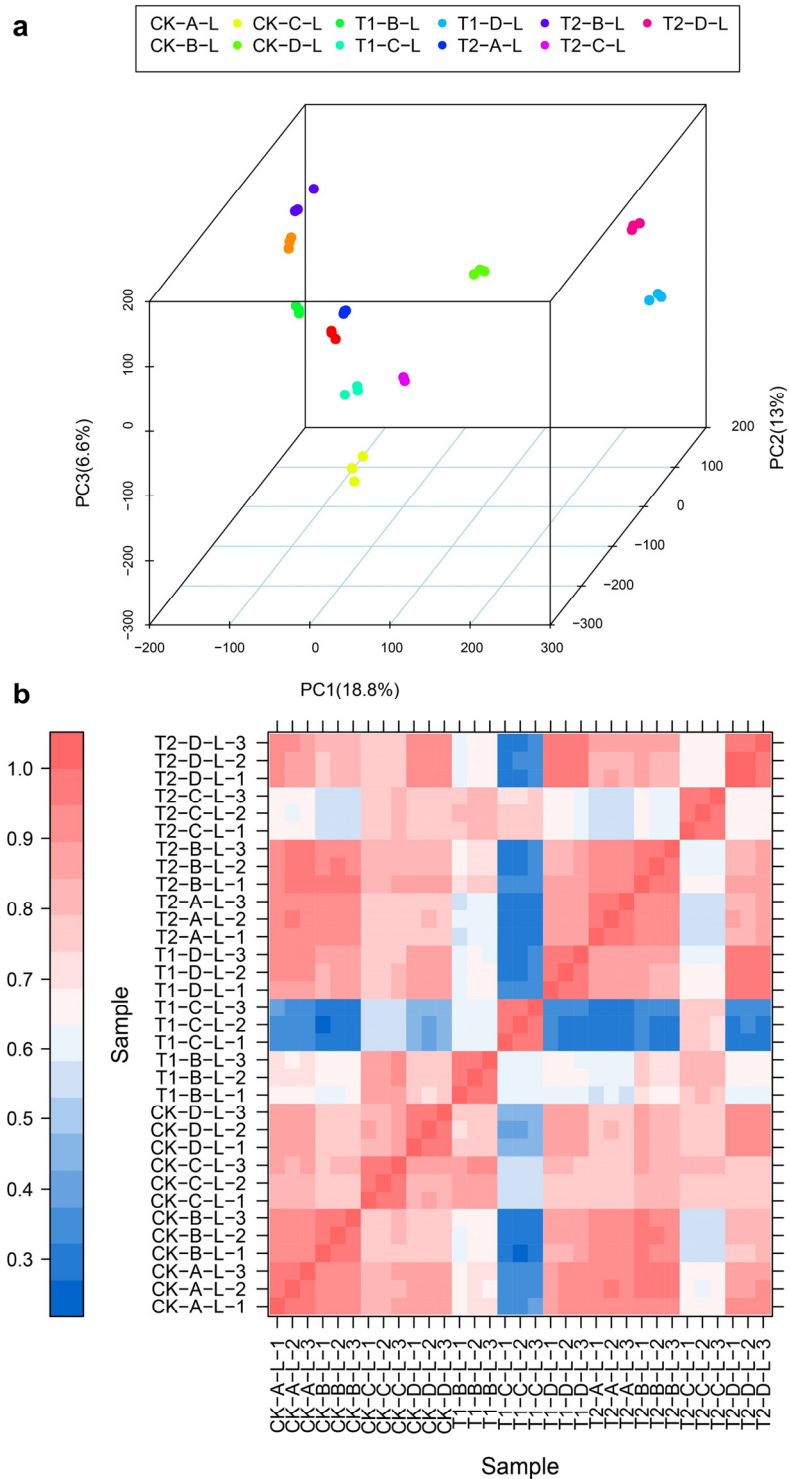

Figure S6. Quality evaluation of RNA-seq data. a, PCA displaying the major composition of variance; b, representation of correlation matrix between RNA-seq samples based on Pearson correlation coefficients. A, B, C and D in coordinate maenad different sampling times, A= after water stress 0 d, B= after water stress 2 d, C= after water stress 5 d, D= rehydration for 1 d.

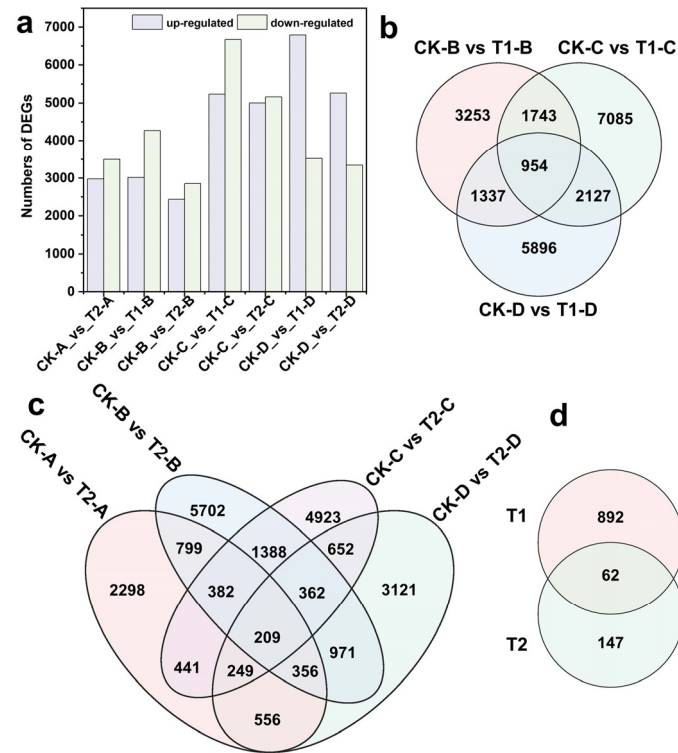

Figure S7. Comparison of differentially expressed genes between CK, T1, and T2. a, the number of up-regulated and down-regulated DEGs. b, Venn diagrams of common and unique DEGs between T1 and CK at different time; c, Venn diagrams of common and unique DEGs between T2 and CK at different time; d, Venn diagrams between T1 and T2 of above overlap DEGs. A, B, C and D in coordinate or Venn diagrams mean different sampling times, A= after water stress 0 d, B= after water stress 2 d, C= after water stress 5 d, D= rehydration for 1 d.

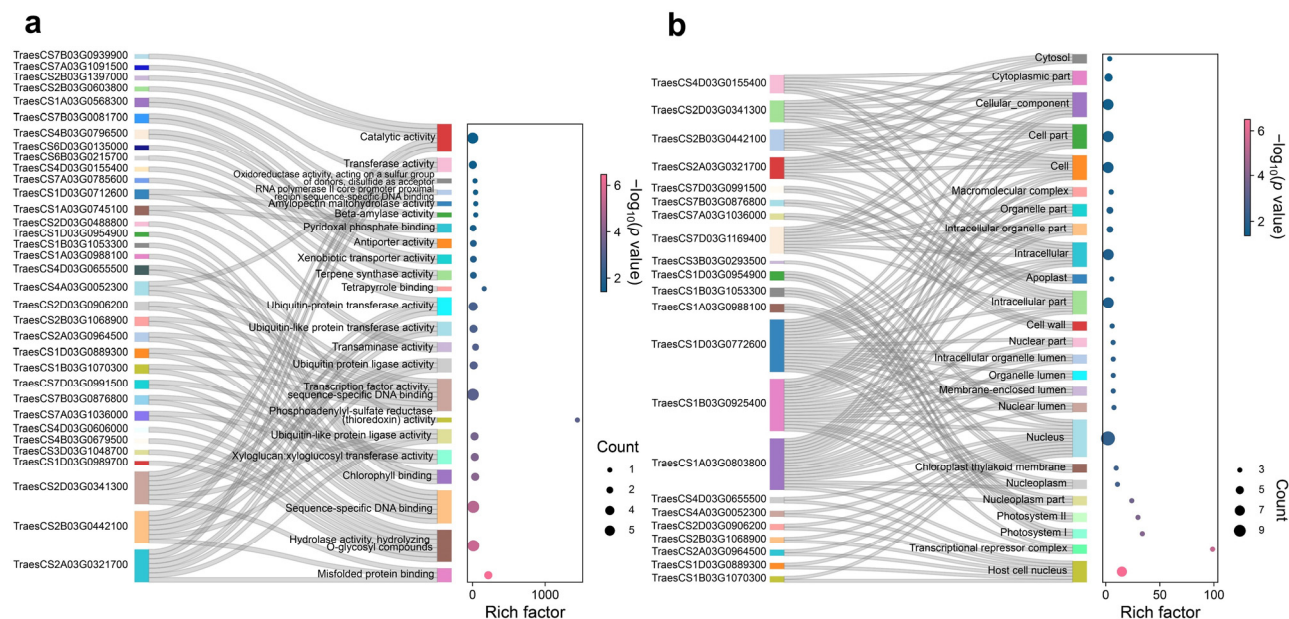

Figure S8. GO annotation based on molecular function and cellular component of 62 DEGs. a, sankey dot plot of GO analysis based on molecular function; b, sankey dot plot of GO analysis based on cellular component. The dot size is based on the gene count enriched in the pathway, and the color of the dot shows the pathway enrichment significance. All enrichment results were selected with the significance threshold “ $p < 0.05$ ”.



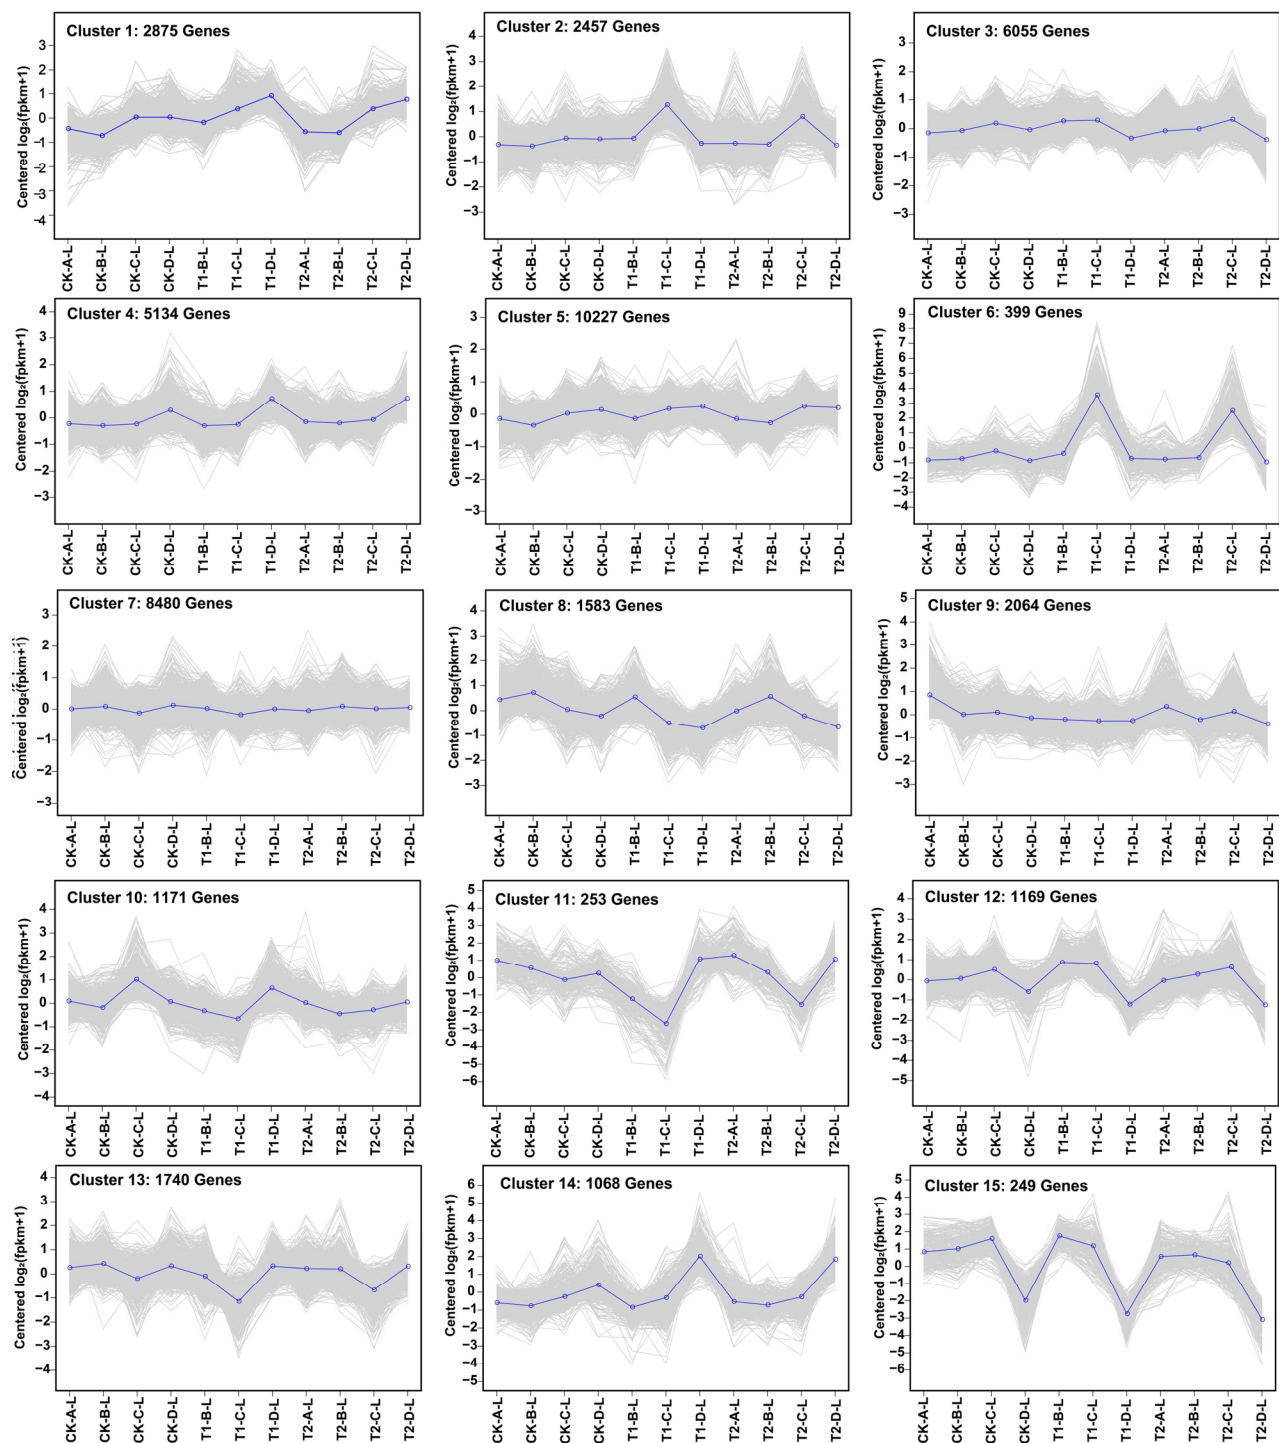

Figure S9. K-means clustering of global DEGs expression. The numbers of genes in each cluster are shown on the top of each graph.

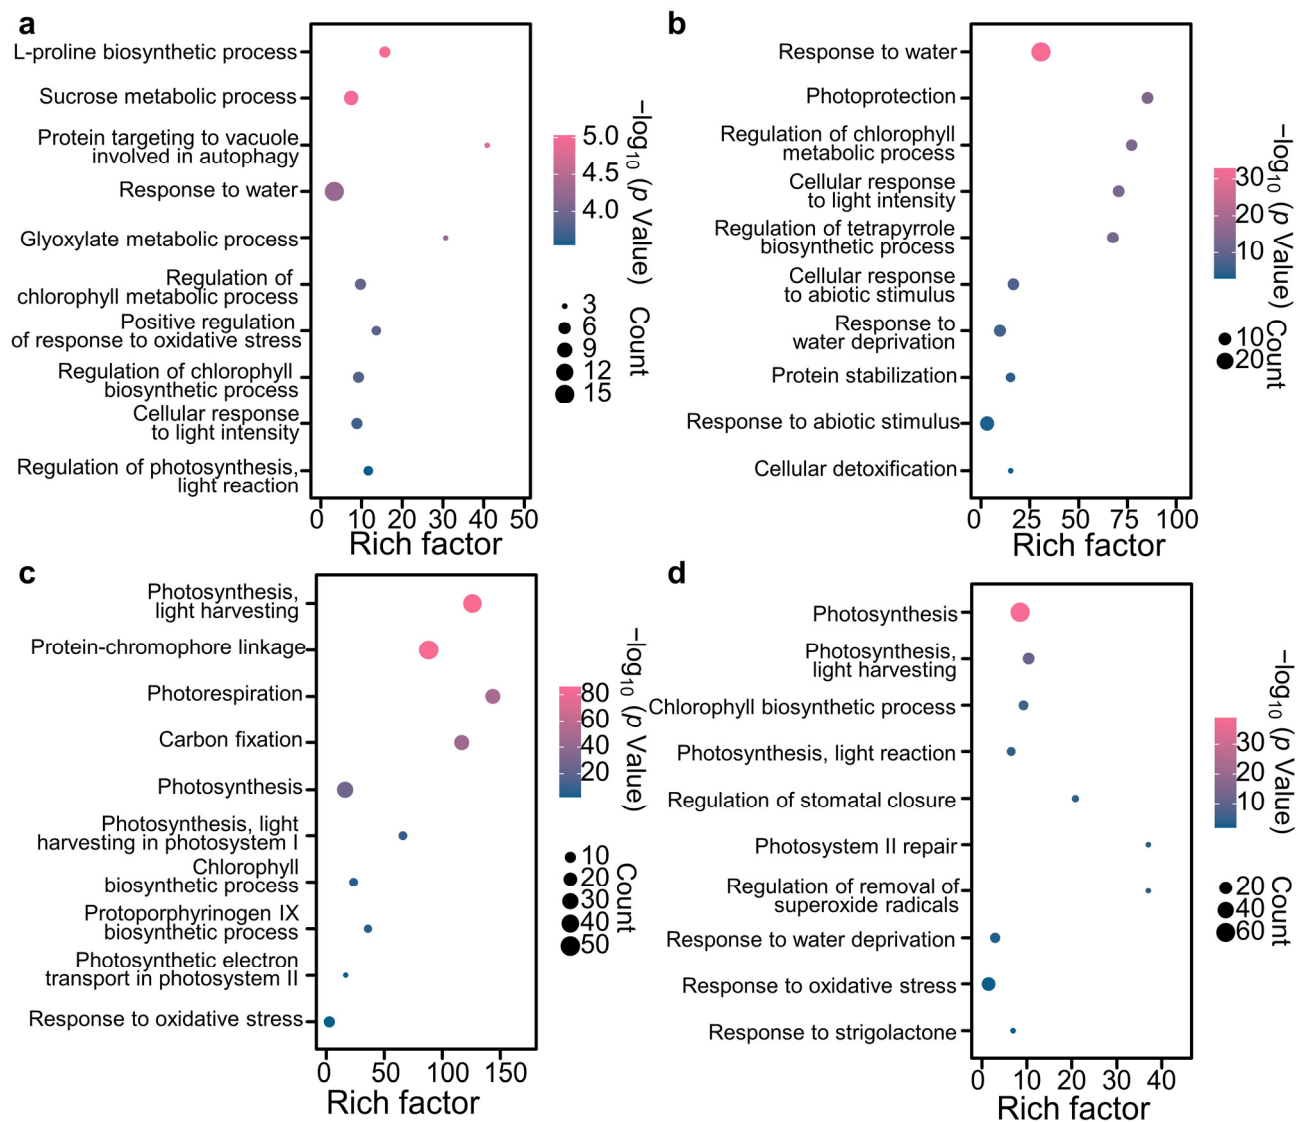

Figure S10. GO enrichment based on biological processes of key clusters by K-means clustering. a, GO enrichment analysis of cluster 2; b, GO enrichment analysis of cluster 6; c, GO enrichment analysis of cluster 11; d, GO enrichment analysis of cluster 13. The dot size is based on the gene count enriched in the pathway, and the color of the dot shows the pathway enrichment significance. All enrichment results were selected with the significance threshold “ $p < 0.05$ ”.

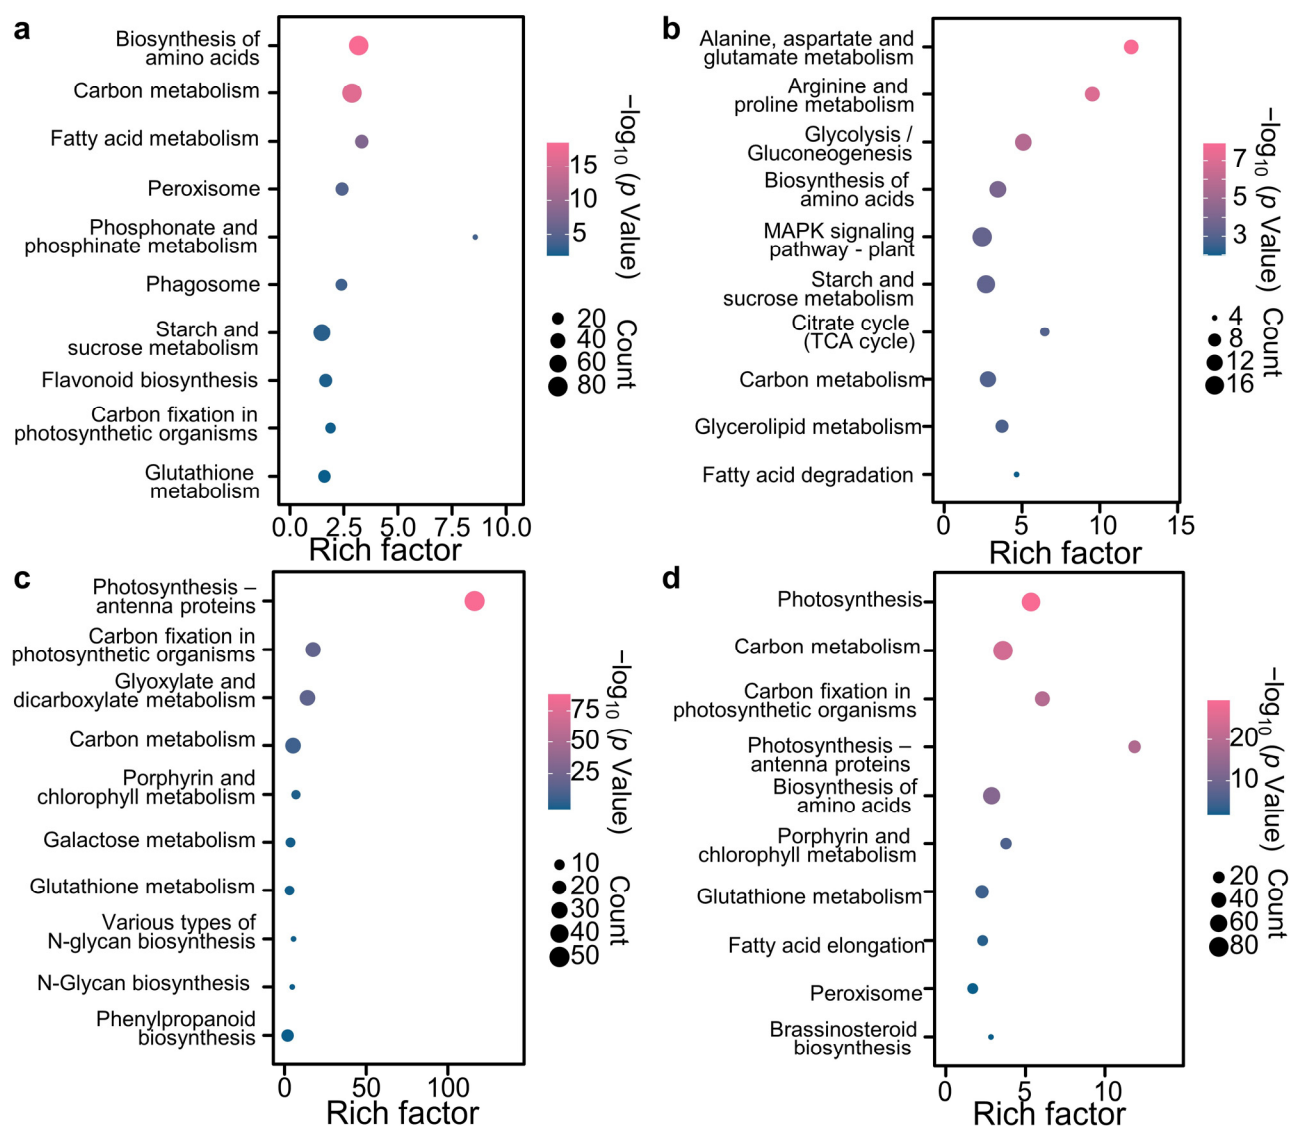

Figure S11. KEGG enrichment of key clusters by K-means clustering. a, KEGG enrichment analysis of cluster 2; b, KEGG enrichment analysis of cluster 6; c, KEGG enrichment analysis of cluster 11; d, KEGG enrichment analysis of cluster 13. The dot size is based on the gene count enriched in the pathway, and the color of the dot shows the pathway enrichment significance. All enrichment results were selected with the significance threshold “ $p < 0.05$ ”.

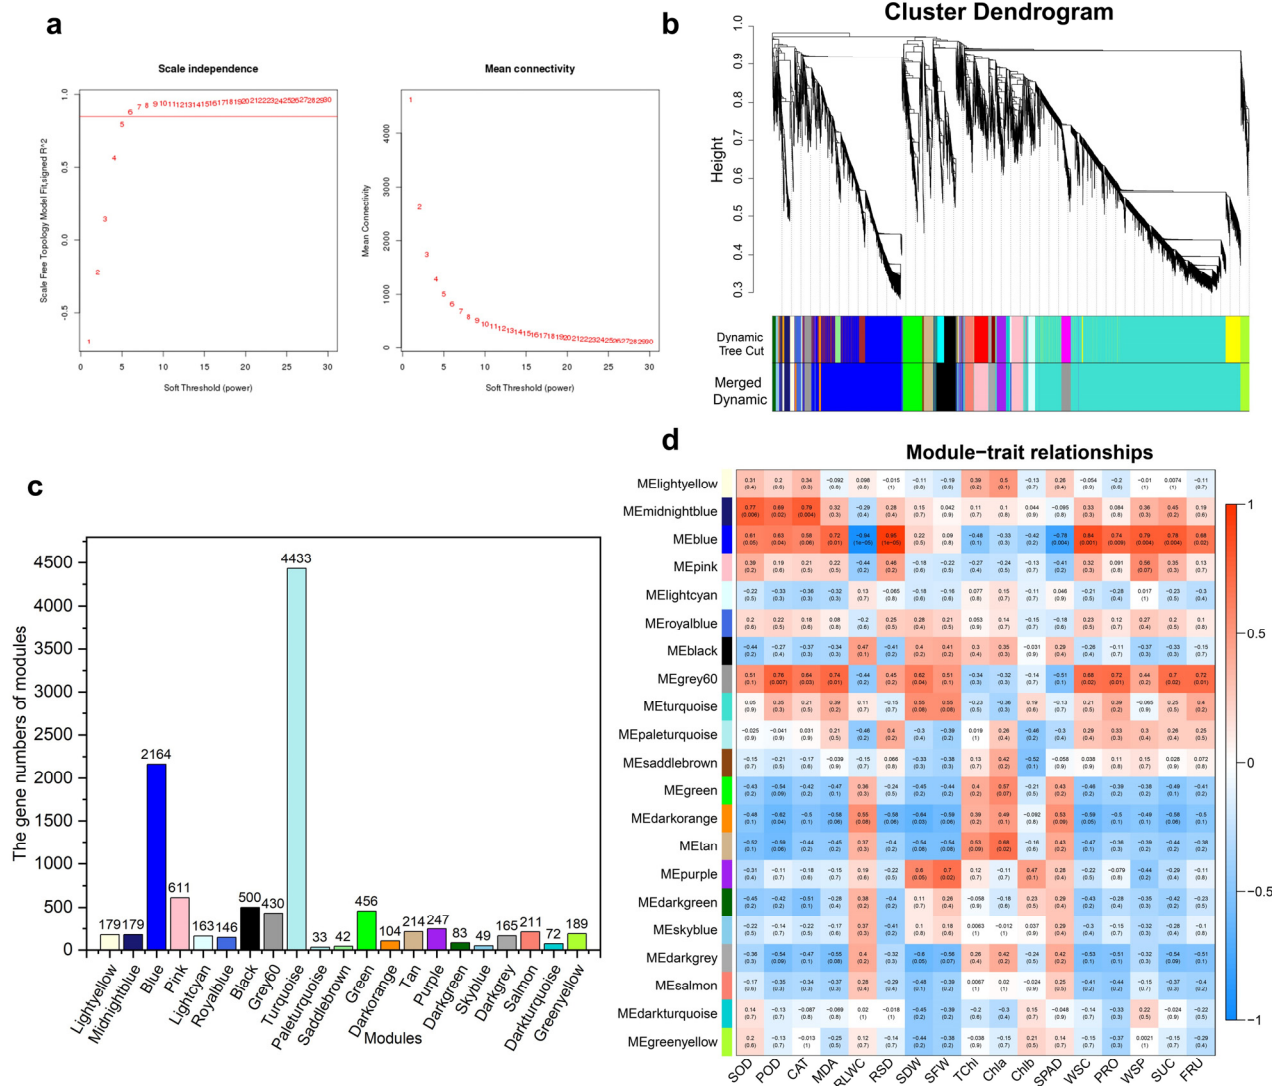

Figure S12. WGCNA process. a, network topology analysis of various soft thresholds. The left panel shows the scale-free fitting index (Y-axis) as a function of the soft threshold (X-axis). The right panel shows average connectivity (Y-axis) as a soft threshold (X-axis); b, systematic clustering tree of gene, gene network/module generated by dynamic shear method and gene network/module after merger; c, the genes number of module; d, relationships between modules and traits. The darker colors indicate higher correlation coefficients. Numbers represent Pearson's correlation coefficients  $R^2$ -values and the  $p$ -value for the correlation

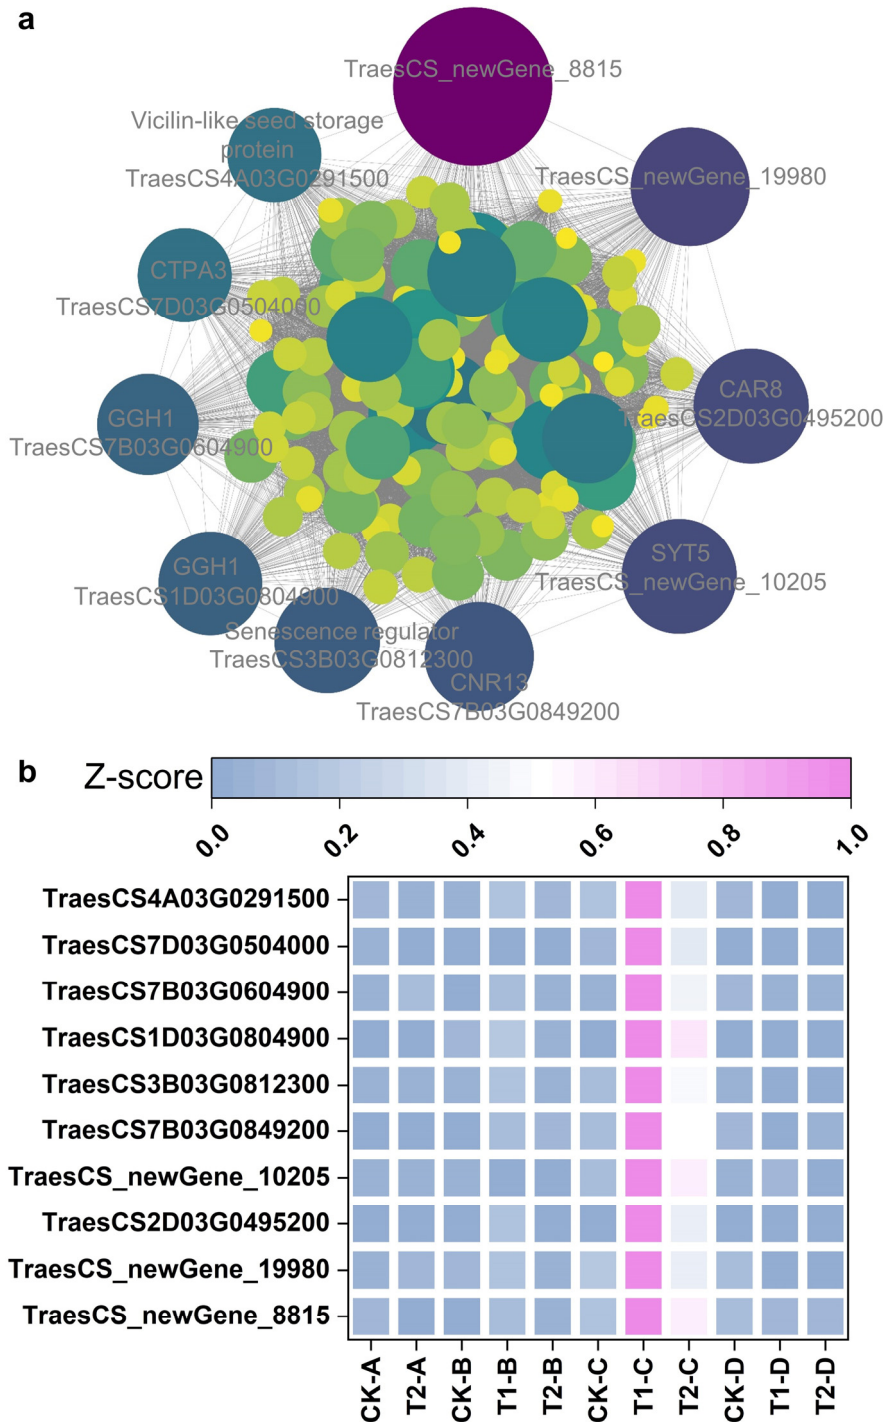

Figure S13. Hub genes based on WGCNA. a, Co-expression networks of the top 10 hub genes in the blue module, the dark carmine color and big circle area indicate a higher MMC score calculated with the CYTOHUBAA plugin of the CYTOSCAPE software. b, the heatmap of gene FPKM expression in blue module, the expression level of the same gene was normalized by Z-score. A, B, C and D in coordinate maenad different sampling times, A= after water stress 0 d, B= after water stress 2 d, C= after water stress 5 d, D= rehydration for 1 d.



Table S1. Primers used in this study.

| GeneID              | Gene name        | Description                            | Forward primer        | Reverse primer        |
|---------------------|------------------|----------------------------------------|-----------------------|-----------------------|
| TraesCS2A03G0274100 | <i>CHLH</i>      | Magnesium-chelatase                    | CTTCATCGGCTCGCTCATCT  | GGAAGAAGGGGCTCTTGGAC  |
| TraesCS7D03G0817400 | <i>PPH</i>       | Pheophytinase                          | AAGTGGCGATTCTGGTCTG   | GGTCACGCCACAAGTCTACA  |
| TraesCS1B03G1053300 | <i>WHAB1.6</i>   | Chlorophyll A-B binding protein        | TACTTGACCGGCGAGTTTCC  | ATAGAGAACATGGCGAGGCG  |
| TraesCS1A03G0809500 | <i>PSBW</i>      | Photosystem II reaction cente          | TCTGGTGGGGTTTGCAATTGT | TCCTCTTGGGTCCAATTGCC  |
| TraesCS6D03G0465200 | <i>PNSL2</i>     | Photosynthetic NDH                     | GTACTGTTCTACGTGCGGCT  | ACGTCATCCAGCGACTTCAG  |
| TraesCS4A03G0026400 | <i>AGT2</i>      | Alanine glyoxylate aminotransferase    | TTGCAGACGTGGAAGTACCC  | ACAACCTGCACCGAGTGGTAG |
| TraesCS4A03G0974600 | <i>Fe/Mn SOD</i> | Superoxide dismutases                  | AAGGAGGCCTACAACAACGG  | TGTGAACCACCTCGAGCTTC  |
| TraesCS1D03G0224900 | <i>PER22</i>     | Peroxidase                             | CCAACCTTTTTCGAAGCCGGG | GGTAGTATCGTCGAGCGTGG  |
| TraesCS6D03G0101500 | <i>CAT2</i>      | Catalase                               | ACCCAGGACCTCTACGACTC  | AGCTGCTCGTTCTCGTTGAA  |
| TraesCS4A03G0218000 | <i>APX1</i>      | L-ascorbate peroxidase                 | GAGGTCTGGCTTTGAGGGAC  | GGAAGACAGGGTCAGTCAGC  |
| TraesCS5D03G0067100 | <i>GSTU6</i>     | Glutathione S-transferase              | CCTCAGCTACGAGTACGTGG  | AACACCCCTCCAAGGTTTC   |
| TraesCS5B03G0125800 | <i>GRXC1</i>     | Glutaredoxin                           | ATGGAGCAGGTGACGAAGC   | GTTCCACCACCGTCGGATT   |
| TraesCS2D03G0904100 | <i>BB</i>        | E3 ubiquitin-protein ligase            | AGGGAAGAAGGAAGCGGTTG  | TCGCGGTTCTTGTAAAGCCAT |
| TraesCS5B03G1347800 | <i>HSFA1</i>     | Heat stress transcription factor       | ACCATCGCATGCAAACAACC  | CCTCCATCCCAAACCTCCCC  |
| TraesCS4A03G0135000 | <i>HSP21</i>     | heat shock protein                     | TCGCGCTGGATTTGACATCT  | GTCCATCGTGTCAGCATCT   |
| TraesCS1A03G0610200 | <i>ATJ3</i>      | DnaJ                                   | CGCGTGCTCGACTTCTATCT  | TTTGTTGATTGCCCGCAG    |
| TraesCS7A03G0627300 | <i>BAG1</i>      | BAG domain                             | AGAAGAACGTGGAGACGCTG  | GGACAGCAGGTGGAACGTAT  |
| TraesCS1A03G0693200 | <i>ACT7</i>      | $\beta$ -Actin (internal control gene) | TATGCCAGCGGTCGAACAAC  | ATGTGGCGCTAGCTAACACTG |

Table S2. Overview of RNA-seq data

| Sample   | Total Reads | Map reads | Q20(%) | Q30(%) | GC (%) | Total map (%) | Unique map (%) | Multi_map (%) |
|----------|-------------|-----------|--------|--------|--------|---------------|----------------|---------------|
| CK-A-L-1 | 71268332    | 33695525  | 97.79  | 94.29  | 58.08  | 94.56%        | 86.98%         | 7.58%         |
| CK-A-L-2 | 73686506    | 34695620  | 97.31  | 92.9   | 57.51  | 94.17%        | 87.18%         | 6.99%         |
| CK-A-L-3 | 72842122    | 34112247  | 97.15  | 92.57  | 57.29  | 93.66%        | 87.06%         | 6.60%         |
| CK-B-L-1 | 69827340    | 32963516  | 97.25  | 92.62  | 56.82  | 94.41%        | 84.54%         | 9.87%         |
| CK-B-L-2 | 65847614    | 31172133  | 97.57  | 93.43  | 56.92  | 94.68%        | 85.44%         | 9.24%         |
| CK-B-L-3 | 70378370    | 33242740  | 97.37  | 92.92  | 57.11  | 94.47%        | 84.94%         | 9.53%         |
| CK-C-L-1 | 83826314    | 39719420  | 97.76  | 93.83  | 56.63  | 94.77%        | 87.79%         | 6.98%         |
| CK-C-L-2 | 70733726    | 33284597  | 97.31  | 92.76  | 56.38  | 94.11%        | 84.97%         | 9.14%         |
| CK-C-L-3 | 71279484    | 33475992  | 97.4   | 92.96  | 56.58  | 93.93%        | 86.34%         | 7.59%         |
| CK-D-L-1 | 67094998    | 31641757  | 97.38  | 92.92  | 56.24  | 94.32%        | 87.29%         | 7.03%         |
| CK-D-L-2 | 69885212    | 32931529  | 97.26  | 92.61  | 56.42  | 94.24%        | 87.19%         | 7.06%         |
| CK-D-L-3 | 77314024    | 36357530  | 97.37  | 92.96  | 56.18  | 94.05%        | 86.06%         | 8.00%         |
| T1-B-L-1 | 67600914    | 31710582  | 97.27  | 92.56  | 56.32  | 93.82%        | 86.45%         | 7.36%         |
| T1-B-L-2 | 65900486    | 30856463  | 97.09  | 92.21  | 56.26  | 93.65%        | 87.09%         | 6.55%         |
| T1-B-L-3 | 68710068    | 32180876  | 97.11  | 92.27  | 56.21  | 93.67%        | 86.65%         | 7.02%         |
| T1-C-L-1 | 65819144    | 31059541  | 97.21  | 92.44  | 55.24  | 94.38%        | 83.31%         | 11.07%        |
| T1-C-L-2 | 66410548    | 31300365  | 97.22  | 92.48  | 55.4   | 94.26%        | 86.97%         | 7.29%         |
| T1-C-L-3 | 86592230    | 41187513  | 97.56  | 93.13  | 55.62  | 95.13%        | 87.23%         | 7.90%         |
| T1-D-L-1 | 65998152    | 31217355  | 97.45  | 93.06  | 56.6   | 94.60%        | 85.27%         | 9.34%         |
| T1-D-L-2 | 64623480    | 30403432  | 97.06  | 92.14  | 56.75  | 94.09%        | 86.98%         | 7.11%         |
| T1-D-L-3 | 69101260    | 32423503  | 97.17  | 92.44  | 56.75  | 93.84%        | 86.64%         | 7.20%         |
| T2-A-L-1 | 74460748    | 35165230  | 97.47  | 93.27  | 57.66  | 94.45%        | 83.54%         | 10.91%        |
| T2-A-L-2 | 67675478    | 31969735  | 97.34  | 92.93  | 57.7   | 94.48%        | 83.96%         | 10.52%        |
| T2-A-L-3 | 79124390    | 37370014  | 97.37  | 93.06  | 57.57  | 94.46%        | 82.29%         | 12.17%        |
| T2-B-L-1 | 65552724    | 30826515  | 97.36  | 92.91  | 56.67  | 94.05%        | 85.51%         | 8.54%         |
| T2-B-L-2 | 73940060    | 34800738  | 97.24  | 92.44  | 56.89  | 94.13%        | 86.98%         | 7.15%         |
| T2-B-L-3 | 70574386    | 33209521  | 97.36  | 92.94  | 56.97  | 94.11%        | 87.03%         | 7.08%         |
| T2-C-L-1 | 67400870    | 31641359  | 97.38  | 92.91  | 55.56  | 93.89%        | 85.55%         | 8.34%         |
| T2-C-L-2 | 71199134    | 33292183  | 96.96  | 91.97  | 55.54  | 93.52%        | 85.88%         | 7.64%         |
| T2-C-L-3 | 64275602    | 30198599  | 97.3   | 92.7   | 55.57  | 93.97%        | 86.13%         | 7.84%         |
| T2-D-L-1 | 68247848    | 32239432  | 97.81  | 94.27  | 57.19  | 94.48%        | 88.51%         | 5.97%         |
| T2-D-L-2 | 65652762    | 30929274  | 97.9   | 94.45  | 56.78  | 94.22%        | 88.20%         | 6.02%         |
| T2-D-L-3 | 68521852    | 32326872  | 97.56  | 93.32  | 56.38  | 94.35%        | 87.78%         | 6.58%         |

Total reads: counts of clean reads; Counts of mapped reads and the proportion of that in clean data; Unique-mapped Reads: Counts of reads mapped to a unique position on reference genome and proportion of that in clean data; Multiple mapped reads: Counts of reads mapped to multiple positions on reference genome and proportion of that in clean data; Q20: Percentage of bases with Q-score 20; Q30: Percentage of bases with Q-score 30.

Table S3. Descriptions of 62 DEGs

| Funcation                    | Gene ID             | Gene name | Description                                         |
|------------------------------|---------------------|-----------|-----------------------------------------------------|
| Photosynthesis               | TraesCS1A03G0988100 | WHAB1.6   | Chlorophyll A-B binding protein                     |
|                              | TraesCS1B03G1053300 | WHAB1.6   | Chlorophyll A-B binding protein                     |
|                              | TraesCS1D03G0954900 | WHAB1.6   | Chlorophyll A-B binding protein                     |
|                              | TraesCS1A03G0568300 | BAM3      | Beta-amylase                                        |
|                              | TraesCS4D03G0155400 | GUN4      | Tetrapyrrole-binding protein                        |
|                              | TraesCS3B03G0355600 | PPT3      | Phosphoenolpyruvate/phosphate translocator          |
|                              | TraesCS1A03G0745100 | AGXT2.3   | Alanine--glyoxylate aminotransferase                |
|                              | TraesCS1D03G0712600 | AGXT2.3   | Alanine--glyoxylate aminotransferase                |
| Antioxidants                 | TraesCS2D03G0229100 | --        | Peroxidase                                          |
|                              | TraesCS3A03G0704900 | RhGT1     | Anthocyanidin 5,3-O-glucosyltransferase             |
|                              | TraesCS7A03G1091500 | --        | Anthocyanidin reductase                             |
|                              | TraesCS7B03G0939900 | --        | Anthocyanidin reductase                             |
| Transcription, modifications | TraesCS1D03G0291200 | TECPR1    | Tectonin beta-propeller repeat-containing protein 1 |
|                              | TraesCS1B03G1070300 | HSFA2C    | Heat stress transcription factor A-2c               |
|                              | TraesCS1D03G0889300 | HSFA2C    | Heat stress transcription factor A-2c               |
|                              | TraesCS2A03G0964500 | HSFB2A    | Heat stress transcription factor B-2a               |
|                              | TraesCS2B03G1068900 | HSFB2A    | Heat stress transcription factor B-2a               |
|                              | TraesCS2D03G0906200 | HSFB2A    | Heat stress transcription factor B-2a               |
|                              | TraesCS4A03G0052300 | HSFA2D    | Heat stress transcription factor A-2d               |
|                              | TraesCS4D03G0655500 | HSFA2D    | Heat stress transcription factor A-2d               |
|                              | TraesCS7D03G1169400 | --        | Chaperone protein dnaJ                              |
|                              | TraesCS3B03G0293500 | ZFC3H1    | Zinc finger protein                                 |
|                              | TraesCS2A03G0321700 | MPSR1     | E3 ubiquitin-protein ligase                         |
|                              | TraesCS2B03G0442100 | MPSR1     | E3 ubiquitin-protein ligase                         |
|                              | TraesCS2D03G0341300 | MPSR1     | E3 ubiquitin-protein ligase                         |
|                              | TraesCS7A03G0785600 | CHIP      | E3 ubiquitin-protein ligase                         |
|                              | TraesCS4D03G0504300 | CRRSP55   | Cysteine-rich repeat secretory protein              |
|                              | TraesCS3B03G0790800 | CLPB1     | Chaperone protein                                   |
|                              | TraesCS4A03G0004100 | TMEM131   | Transmembrane protein 131-like                      |
|                              | TraesCS6A03G1026500 | --        | BAG domain                                          |
|                              | TraesCS5A03G0463500 | --        | HD-ZIP IV family                                    |
| Signal                       | TraesCS1A03G0803800 | SDI2      | Protein SULFUR DEFICIENCY-INDUCED                   |
|                              | TraesCS1B03G0925400 | SDI1      | Protein SULFUR DEFICIENCY-INDUCED                   |
|                              | TraesCS1D03G0772600 | SDI1      | Protein SULFUR DEFICIENCY-INDUCED                   |
|                              | TraesCS6B03G0215700 | LIS       | S-(+)-linalool synthase                             |
|                              | TraesCS6D03G0135000 | LIS       | S-(+)-linalool synthase                             |
|                              | TraesCS3A03G0590000 | At2g42960 | Protein kinase domain-containing protein            |
|                              | TraesCS2B03G1397000 | EPHX2     | Epoxide hydrolase 2                                 |
| Cell wall biogenesis         | TraesCS4B03G0679500 | BXL7      | beta-D-xylosidase                                   |
|                              | TraesCS4D03G0606000 | BXL7      | beta-D-xylosidase                                   |
|                              | TraesCS7A03G1036000 | XTH23     | xyloglucan endotransglucosylase/hydrolase protein   |
|                              | TraesCS7B03G0876800 | XTH23     | xyloglucan endotransglucosylase/hydrolase protein   |



|        |                     |            |                                                   |
|--------|---------------------|------------|---------------------------------------------------|
|        | TraesCS7D03G0991500 | XTH25      | xyloglucan endotransglucosylase/hydrolase protein |
|        | TraesCS1D03G0989700 | At5g56590  | Glucan endo-1,3-beta-glucosidase                  |
|        | TraesCS3D03G1048700 | --         | Glucan endo-1,3-beta-glucosidase                  |
| Others | TraesCS3A03G0929100 | --         | Late embryogenesis abundant protein               |
|        | TraesCS3D03G0343300 | CYP736A117 | Cytochrome P450                                   |
|        | TraesCS7A03G0869800 | ABCG42     | ABC transporter                                   |
|        | TraesCS4B03G0796500 | DTX27      | Protein DETOXIFICATION 27                         |
|        | TraesCS7B03G0081700 | DTX27      | Protein DETOXIFICATION 27                         |
|        | TraesCS2B03G0603800 | APR1       | 5'-adenylylsulfate reductase                      |
|        | TraesCS2D03G0488800 | APR1       | 5'-adenylylsulfate reductase                      |
|        | TraesCS7A03G1041500 | AAE        | Acetylajmalan esterase                            |
|        | TraesCS1D03G0904000 | --         | Avr9/Cf-9 rapidly elicited protein                |
|        | TraesCS6B03G0289700 | --         | Response to low sulfur protein                    |
|        | TraesCS7A03G0577800 | --         | N-acetyl-gamma-glutamyl-phosphate reductase       |
|        | TraesCS3B03G1056500 | --         | DUF1685 family protein                            |
|        | TraesCS3D03G0863600 | --         | DUF1685 family protein                            |
|        | Traes_newGene_10289 | --         | --                                                |
|        | Traes_newGene_34725 | --         | --                                                |
|        | Traes_newGene_62723 | --         | --                                                |
|        | Traes_newGene_63868 | --         | --                                                |

Table S4. Hub genes annotation

| Hub gene ID           | Description                            | Gene name | MCC score  |
|-----------------------|----------------------------------------|-----------|------------|
| TraesCS_newGene_8815  | --                                     | --        | 5181685800 |
| TraesCS_newGene_19980 | --                                     | --        | 3714561720 |
| TraesCS2D03G0495200   | Protein C2-DOMAIN ABA-RELATED 8        | CAR8      | 3580696296 |
| TraesCS_newGene_10205 | Synaptotagmin-5                        | SYT5      | 3573162408 |
| TraesCS7B03G0849200   | Cell number regulator 13               | CNR13     | 3360559224 |
| TraesCS3B03G0812300   | Senescence regulator                   | --        | 3228583920 |
| TraesCS1D03G0804900   | Gamma-glutamyl hydrolase               | GGH1      | 3158354928 |
| TraesCS7B03G0604900   | Gamma-glutamyl hydrolase               | GGH1      | 3080253648 |
| TraesCS7D03G0504000   | Carboxyl-terminal-processing peptidase | CTPA3     | 2805193848 |
| TraesCS4A03G0291500   | Vicilin-like seed storage protein      | At2g28490 | 2803441704 |
